# Supplementary material for: Nanoscale Ultrafast Lattice Modulation with Hard X-ray Free Electron Laser
Source: Research Square preprint supplement (doi:10.21203/rs.3.rs-6814136/v1), 2025-07-29
Supplement: Supplementary file 1 [file 97569cbe9e23e2da692c4008.pdf]

# Supplementary Information

## Nanoscale Ultrafast Lattice Modulation with Hard X-ray Free Electron Laser

Haoyuan Li<sup>1,3</sup>, Nan Wang<sup>2</sup>, Leon Zhang<sup>5,12</sup>, Sanghoon Song<sup>3</sup>,  
Yanwen Sun<sup>3</sup>, May-Ling Ng<sup>3</sup>, Takahiro Sato<sup>3</sup>, Dillon Hanlon<sup>4</sup>,  
Sajal Dahal<sup>4</sup>, Mario D. Balcazar<sup>3</sup>, Vincent Esposito<sup>3</sup>,  
Selene She<sup>5</sup>, Chance Caleb Ornelas-Skarin<sup>6,12</sup>,  
Joan Vila-Comamala<sup>7</sup>, Christian David<sup>7</sup>, Nadia Berndt<sup>8</sup>,  
Peter Richard Miedaner<sup>8</sup>, Zhuquan Zhang<sup>8</sup>, Matthias Ihme<sup>1,9,11</sup>,  
Mariano Trigo<sup>12, 13</sup>, Keith A. Nelson<sup>8</sup>, Jerome B. Hastings<sup>3,9,12</sup>,  
Alexei A. Maznev<sup>8</sup>, Laura Foglia<sup>10</sup>, Samuel Teitelbaum<sup>4</sup>,  
David A. Reis<sup>5,9,12</sup>, Diling Zhu<sup>3\*</sup>

<sup>1</sup>Mechanical Engineering Department, Stanford University, 440  
Escondido Mall, Stanford, 94305, CA, US.

<sup>2</sup>Physics Department, Stanford University, 382 Via Pueblo Mall,  
Stanford, 94305, CA, US.

<sup>3</sup>Linac Coherent Light Source, SLAC National Accelerator Laboratory,  
2575 Sand Hill Rd, Menlo Park, 94025, CA, US.

<sup>4</sup>Physics Department, Arizona State University, 550 E Tyler Drive,  
Tempe, 85287, AZ, US.

<sup>5</sup>Applied Physics Department, Stanford University, 348 Via Pueblo,  
Stanford, 94305, CA, US.

<sup>6</sup>Electric Engineering Department, Stanford University, 350 Jane  
Stanford Way, Stanford, 94305, CA, US.

<sup>7</sup>Paul Scherrer Institute, Forschungsstrasse 111, Villigen, 5232 ,  
Switzerland.

<sup>8</sup>Department of Chemistry, Massachusetts Institute of Technology, 77  
Massachusetts Ave, Cambridge, 02139, MA, US.

<sup>9</sup>Department of Photon Science, SLAC National Accelerator Laboratory,  
2575 Sand Hill Rd, Menlo Park, 94025, CA, US.

<sup>10</sup>Elettra - Sincrotrone Trieste S.C.p.A., Basovizza, 34149, Italy.

<sup>11</sup>Department of Energy Science & Engineering, Stanford University, 367  
Panama Street, Stanford, 94305, CA, US.

<sup>12</sup>Stanford PULSE Institute 2575 Sand Hill Rd, Menlo Park, 94025, CA,  
US.

<sup>13</sup>Stanford Institute for Materials and Energy Sciences 2575 Sand Hill  
Rd, Menlo Park, 94025, CA, US.

\*Corresponding author(s). E-mail(s): [dlzhu@slac.stanford.edu](mailto:dlzhu@slac.stanford.edu);  
Contributing authors: [hyli16@stanford.edu](mailto:hyli16@stanford.edu); [nanw0321@stanford.edu](mailto:nanw0321@stanford.edu);  
[zleon@stanford.edu](mailto:zleon@stanford.edu); [sanghoon@slac.stanford.edu](mailto:sanghoon@slac.stanford.edu);  
[yanwen@slac.stanford.edu](mailto:yanwen@slac.stanford.edu); [mlng@slac.stanford.edu](mailto:mlng@slac.stanford.edu);  
[takahiro@slac.stanford.edu](mailto:takahiro@slac.stanford.edu); [dfhanlon@asu.edu](mailto:dfhanlon@asu.edu);  
[sdahal15@mainex1.asu.edu](mailto:sdahal15@mainex1.asu.edu); [mdbm@slac.stanford.edu](mailto:mdbm@slac.stanford.edu);  
[vincent.esposito@stanford.edu](mailto:vincent.esposito@stanford.edu); [bshe@stanford.edu](mailto:bshe@stanford.edu);  
[ccornela@stanford.edu](mailto:ccornela@stanford.edu); [joan.vila-comamala@psi.ch](mailto:joan.vila-comamala@psi.ch);  
[christian.david@psi.ch](mailto:christian.david@psi.ch); [nadiaber@mit.edu](mailto:nadiaber@mit.edu); [miedaner@mit.edu](mailto:miedaner@mit.edu);  
[zhuquan@mit.edu](mailto:zhuquan@mit.edu); [mihme@stanford.edu](mailto:mihme@stanford.edu); [mtrigo@slac.stanford.edu](mailto:mtrigo@slac.stanford.edu);  
[kanelson@mit.edu](mailto:kanelson@mit.edu); [jerryh@stanford.edu](mailto:jerryh@stanford.edu); [alexei.maznev@gmail.com](mailto:alexei.maznev@gmail.com);  
[laura.foglia@elettra.eu](mailto:laura.foglia@elettra.eu); [SamuelT@asu.edu](mailto:SamuelT@asu.edu); [dreis@stanford.edu](mailto:dreis@stanford.edu);

## Supplementary Note 1 Experimental Setup

### Note 1.1 Ray tracing analysis

The synchronization of the two pump pulses on the sample is achieved through the symmetry of the trajectory within the  $x$ - $z$  plane as shown in [Extended Data Figure 1\(b\)](#). Due to installation, alignment, and motor operation errors,  $M_1$  and  $M_2$  are not ideally symmetric. We use ray-tracing analysis to estimate the tolerance of installation and alignment errors of  $M_1$  and  $M_2$ .

[Extended Data Figure 2\(a\)](#) shows the X-ray trajectory between  $G$  and the sample. In the experimental setup,  $d_0 \approx 6$  m. The alignment uncertainty of the X-ray in the transverse plane is assumed to be  $\Delta\eta \leq 2$   $\mu\text{m}$ . The coherence time of the X-ray pulse after the split-delay optics is 10 fs. To guarantee a high contrast of the interference between the two X-ray pulses, the path length difference should be smaller than 10% of the coherence length, i.e.,  $|\Delta(l_1 + l_2)| \leq 0.3$   $\mu\text{m}$ .

For a given grating diffraction angle  $\alpha_0/2$ , grating-sample distance  $d_0$ , and the beam position on the sample plane  $\eta = 0$ , the total path length  $l_1 + l_2$  is solely determined by the mirror angle  $\alpha$ . It can be shown that:

$$l_1 + l_2 = \frac{d_0 \left( \sin \frac{\alpha_0}{2} + \sin \bar{\alpha} \right) + v \left( \cos \bar{\alpha} - \cos \frac{\alpha_0}{2} \right)}{\sin(2\alpha)}. \quad (\text{SI-1})$$

where  $\bar{\alpha} \equiv 2\alpha - \frac{\alpha_0}{2}$ .

By uniformly sampling  $\eta \in [-2, 2]$   $\mu\text{m}$  and  $\alpha \in [0.15^\circ - 0.1^\circ, 0.15^\circ + 0.1^\circ]$ , and assuming that  $d_0 = 6$  m, the range of the deviation of  $l_1 + l_2$  from its ideal value at  $\eta = 0$  and  $\alpha = 0.15^\circ$  is shown as a function of  $\Delta\alpha$  in [Extended Data Figure 2\(b\)](#). In [Extended Data Figure 2\(b\)](#), green vertical lines indicate  $\Delta\alpha = \pm 0.01^\circ$ , while the red horizontal lines indicate  $\Delta(l_1 + l_2) = \pm 0.3$   $\mu\text{m}$ . Therefore, to achieve sub-femtosecond synchronization, we only need to guarantee that  $|\Delta\eta| \leq 2$   $\mu\text{m}$  and that  $|\Delta\alpha| \leq 0.01^\circ$ .

### Note 1.2 Mirror angle calibration

In this experiment, we control mirror angles with motorized stages. A stage with model SA10A-RT01 (Kohzu Precision Co.,Ltd.) is used to rotate  $M_0$ , while two stages with model SA05A-RT02 (Kohzu Precision Co.,Ltd.) are used for  $M_1$  and  $M_2$ . The angle accuracy of SA05A-RT02 (Kohzu Precision Co.,Ltd.) is  $0.000765^\circ$  according to the spec, significantly smaller than the  $0.01^\circ$  requirement. Therefore, the angle uncertainty of  $M_1$  and  $M_2$  is dominated by the installation and alignment accuracy.

Denote the feedback value of the rotation stage with  $\alpha_f$ . The  $\alpha_f$  has an offset with respect to the grazing angle  $\alpha$  with respect to the incident X-ray pulse:  $\alpha_f \equiv \alpha + \alpha_{\text{off}}$ , where  $\alpha_{\text{off}}$  indicates the offset value. Due to the high motor motion accuracy, we assume the uncertainty of  $\alpha$  to equal that of  $\alpha_{\text{off}}$ . The uncertainty of  $\alpha_{\text{off}}$  is determined by analyzing the X-ray profile on the sample plane beam profile monitor with partial reflections as shown in [Extended Data Figure 3\(a\)](#).

In [Extended Data Figure 3\(a\)](#), the distance between the rotation center and beam center is  $l_0$ , the beam size is  $L$ , and the distance between the rotation center and the sample plane is  $D$ . Assume that, without the mirror, the lower edge of the beam is

at location  $O$ . The mirror length is  $l_M$  and we assume that the rotation center of the mirror is at the center of the reflection surface. For a given grazing angle  $\alpha$ , the lower edge of the X-ray that passes by the mirror is at a distance of  $s_1$  with respect to  $O$ , while the upper edge of the reflected pulse has a distance  $s_2$  with respect to  $O$ . We can show that:

$$s_1 = \frac{l_M}{2} \sin \alpha - \left( l_0 - \frac{L}{2} \right), \quad (\text{SI-2})$$

$$s_2 = \left( D - \left( l_0 - \frac{L}{2} \right) \frac{1}{\tan \alpha} \right) \tan (2\alpha). \quad (\text{SI-3})$$

Therefore,

$$s_2 - s_1 = D \tan (2\alpha) - \left( l_0 - \frac{L}{2} \right) \left( \frac{\tan (2\alpha)}{\tan \alpha} - 1 \right) - \frac{l_M}{2} \sin \alpha. \quad (\text{SI-4})$$

We align the mirror rotation center to the lower edge of the incident X-ray pulse and therefore  $l_0 \approx L/2$ . Because  $D \approx 0.1 \text{ m} \gg l_0 \approx 75 \text{ } \mu\text{m}$ ,  $D \gg L \approx 150 \text{ } \mu\text{m}$  and  $l_M/2 \approx 0.02 \text{ m}$ ,

$$S_2 - S_1 \approx D \tan (2\alpha_f - 2\alpha_{\text{off}}). \quad (\text{SI-5})$$

For a series of  $\alpha_f$  as documented in [Extended Data Table 1](#) for  $M_1$  and  $M_2$ , we measure the edge separation  $S_2 - S_1$ .

We then compute the mean error,  $\Xi(D, \alpha_{\text{off}})$ , between the measured edge separation  $S_2 - S_1$  and that from the [SI-5](#) for a given  $D$  and  $\alpha_{\text{off}}$ . Here, the mean error,  $\Xi(D, \alpha_{\text{off}})$ , is defined as:

$$\Xi(D, \alpha_{\text{off}}) \equiv \sqrt{\frac{1}{n} \sum_{l=1}^n (S'(\alpha_{f,l}; \text{Exp}) - S'(\alpha_{f,l}; \alpha_{\text{off}}, D))^2}, \quad (\text{SI-6})$$

$$S'(\alpha_f; \alpha_{\text{off}}, D) \equiv D \tan (2\alpha_f - 2\alpha_{\text{off}}), \quad (\text{SI-7})$$

$$S'(\alpha_f; \text{Exp}) : \text{Measured } S_2 - S_1 \text{ at } \alpha_f. \quad (\text{SI-8})$$

Here,  $n$  is the total measurement number and  $\alpha_{f,l}$  indicates the  $l^{\text{th}}$  motor feedback value.

The value of  $\Xi(D, \alpha_{\text{off}})$  for a range of  $D$  and  $\alpha_{\text{off}}$  is shown in [Extended Data Figure 3\(c\)](#) and (d) respectively for the measurement of  $M_1$  and  $M_2$ . The position of the global minimum of  $\Xi(D, \alpha_{\text{off}})$  gives the nominal  $D$  and  $\alpha_{\text{off}}$  for us to improve the symmetry of the X-ray trajectory for the two pump pulses. The purple ellipse in [Extended Data Figure 3\(c\)](#) and (d) encloses the region smaller than twice of the global minimum of  $\Xi(D, \alpha_{\text{off}})$ . The extension of the projection of the purple ellipse along the axes determines the uncertainty of  $D$  and  $\alpha_{\text{off}}$ , respectively. For both  $M_1$  and  $M_2$ , the uncertainty in  $\alpha_{\text{off}}$  is  $0.003^\circ$ . This results in the  $0.003^\circ$  uncertainty of  $\alpha$  utilized in this work.

### Note 1.3 Detector geometry calibration

The scattered wave-vector  $Q$  for each pixel on our detector is calibrated with the powder rings from a  $\text{LaB}_6$  powder sample. The  $\text{LaB}_6$  sample is installed on the sample mount for STO. Through the optimization of the overlap of the documented ring position with measured powder rings as shown in [Extended Data Figure 8](#), detector distance is determined to be 12 cm downstream the X-ray-sample interaction point along the z axis, and the lower right corner of the detector is 89.2 mm and -11.0 mm away from the X-ray sample interaction point along the x and y axis. The [Extended Data Figure 8](#) (b), (c) and (d) show the overlap of the measured powder ring with documented ring positions with calibrated detector position and distance.

In the analysis, only a small region around the Bragg peak is of interest. The  $Q$  of each pixel within this region is shown in [Extended Data Figure 9](#) (a) where the number on the axes indicates the corresponding pixel index in [Extended Data Figure 8](#) (a). The equivalent reduced wave-vector in the first Brillouin zone,  $q$ , for each pixel is shown in [Extended Data Figure 9](#) (b), (c) and (d) for different XTG measurements. The text in the lower left corner of [Extended Data Figure 9](#) of (b), (c) and (d) indicates  $\Lambda_{\text{TG}}$  and the transient grating wave-vector.

Due to the high angle accuracy of  $M_1$  and  $M_2$ , we use the XTG wave-vector as the reference wave-vector to derive  $q$  for other pixels. In the derivation, we first derive  $\mathbf{Q}$  for each pixel, and then derive  $\mathbf{H}$  according to  $\pm \mathbf{k}_{\text{TG}} = \mathbf{q} \equiv \mathbf{Q} - \mathbf{H}$  with the  $\mathbf{Q}$  of the pixel on the XTG peak. With  $\mathbf{H}$ , we obtain the  $\mathbf{q}$  for other pixels shown in [Extended Data Figure 9](#).

## Supplementary Note 2 Transient Grating Theory

### Note 2.1 Scattering intensity from lattice modification

We use kinematic X-ray scattering theory to analyze the measured signal. The dominant signal observed in the measurement comes from the longitudinal acoustic phonon. Therefore, we assume that the unit cell of the SrTiO<sub>3</sub> (STO) does not change during evolution.

According to kinematic X-ray scattering theory, the scattering intensity at wave-vector  $\mathbf{Q}$  is:

$$I(\mathbf{Q}, \tau) = \Phi r_e^2 P^2 \Omega_p \left\langle \left| \sum_l F(\mathbf{Q}) e^{i\mathbf{Q} \cdot \mathbf{R}_l(\tau)} \right|^2 \right\rangle, \quad (\text{SI-9})$$

where,  $r_e$  is the classical electron radius,  $P$  is the polarization factor,  $\Phi$  is the incident X-ray photon flux per pulse, and  $\Omega_p$  is the solid angle of the detector pixel. In addition,  $F(\mathbf{Q})$  is the STO unit cell form factor,  $\mathbf{R}_l(\tau)$  is the position of the  $l^{\text{th}}$  unit cell in the illumination volume and the summation is taken over the illumination volume. The  $\langle \cdot \rangle$  indicates the averaging over different X-ray pulses. In the following, we define  $I_{th} \equiv \Phi r_e^2 P^2 \Omega_p$ .

Assume that the coherently scattering volume is  $V$ , and the total illumination volume is  $V'$ . Assume that  $\mathbf{R}_l(\tau) \equiv \mathbf{R}_l + \mathbf{R}'_l(\tau) + \mathbf{U}_l(\tau)$ , where  $\mathbf{R}_l$  is the ideal lattice position,  $\mathbf{R}'_l(\tau)$  represents thermal fluctuations and disorders that lead to the equilibrium diffuse scattering signal without pump X-ray pulses, and  $\mathbf{U}_l(\tau)$  is the XTG induced lattice deformation field. Then the scattering intensity is:

$$\begin{aligned} I(\mathbf{Q}, \tau) &\approx I_{th} \frac{V'}{V} \left\langle \left| \sum_l F(\mathbf{Q}) e^{-i\mathbf{Q} \cdot (\mathbf{R}_l + \mathbf{R}'_l(\tau))} + F(\mathbf{Q}) e^{-i\mathbf{Q} \cdot \mathbf{R}_l} i\mathbf{Q} \cdot \mathbf{U}_l(\tau) \right|^2 \right\rangle_V \\ &= I_0(\mathbf{Q}) + I_{th} |F(\mathbf{H})|^2 \frac{V'}{V_c^2 V} \left\langle \left| \sum_l e^{-i(\mathbf{Q} - \mathbf{H}) \cdot \mathbf{R}_l} i\mathbf{Q} \cdot \mathbf{U}_l(\tau) V_c \right|^2 \right\rangle_V \\ &\approx I_0(\mathbf{Q}) + I_{th} |F(\mathbf{H})|^2 \frac{V'}{V_c^2 V} \left\langle \left| \int_V e^{-i(\mathbf{Q} - \mathbf{H}) \cdot \mathbf{R}} i\mathbf{Q} \cdot \mathbf{U}(\mathbf{R}, \tau) d^3\mathbf{R} \right|^2 \right\rangle_V \\ &= I_0(\mathbf{Q}) + I_{th} |F(\mathbf{H})|^2 \frac{V'}{V_c^2 V} \left\langle \left| \mathbf{Q} \cdot \tilde{\mathbf{U}}(\mathbf{Q} - \mathbf{H}, \tau) \right|^2 \right\rangle_V. \end{aligned} \quad (\text{SI-10})$$

Here,  $V_c$  is the unit cell volume,  $I_0(\mathbf{Q})$  is the equilibrium X-ray scattering signal without the pump pulse and that,

$$\mathbf{Q} \cdot \tilde{\mathbf{U}}(\mathbf{Q} - \mathbf{H}, \tau) \equiv \int_V e^{-i(\mathbf{Q} - \mathbf{H}) \cdot \mathbf{R}} i\mathbf{Q} \cdot \mathbf{U}(\mathbf{R}, \tau) d^3\mathbf{R}. \quad (\text{SI-11})$$

The  $\langle \cdot \rangle_V$  indicates the averaging over different  $V$  within  $V'$  and averaging over different X-ray pulses, and we assume that  $\mathbf{H}$  is the only reciprocal lattice vector of the sample that is close to  $\mathbf{Q}$ , which is suitable for our measurement.

T

## 161 Note 2.2 Strain field of single photon ionization

162 Due to the small cross section, each absorbed X-ray photon creates its own displace-  
 163 ment field  $\mathbf{u}(\mathbf{r}, 0)$  around the absorption location. We assume that the absorption of  
 164 an X-ray photon leads to a localized spherically symmetric distortion in the equilib-  
 165 rium position of atoms at time  $\tau = 0$ , which launches longitudinal spherical waves  
 166 for  $\tau > 0$  and that the distortion field is curl-free. Therefore, it is the gradient of the  
 167 auxiliary field  $\phi$ :

$$\mathbf{u}(\mathbf{r}, 0) \equiv \nabla \phi(\mathbf{r}, 0). \quad (\text{SI-12})$$

168 Following the same derivation as that shown in [1], the dynamics of the displacement  
 169 field can be described with the following equation and initial conditions:

$$-\left(q^2 + \frac{2}{v^2 \tau_1} \frac{\partial}{\partial \tau} + \frac{1}{v^2} \frac{\partial^2}{\partial \tau^2}\right) \tilde{\phi}(\mathbf{q}, \tau) = \tilde{s}(\mathbf{q}) e^{-\frac{\tau}{\tau_0}} H(\tau), \quad (\text{SI-13})$$

$$\tilde{\phi}(\mathbf{q}, \tau)|_{\tau=0} = 0, \quad (\text{SI-14})$$

$$\frac{\partial}{\partial \tau} \tilde{\phi}(\mathbf{q}, 0) = 0, \quad (\text{SI-15})$$

$$\tilde{s}(\mathbf{q}) = u_0 \exp\left(-\frac{1}{2} \sigma^2 q^2\right), \quad (\text{SI-16})$$

170 where  $\tilde{s}(\mathbf{q})$  is the source of the distortion field in reciprocal space,  $H(\tau)$  is the Heavi-  
 171 side step function, the  $e^{-\frac{\tau}{\tau_0}}$  accounts for relaxation of the distortion of the equilibrium  
 172 position, and that the  $\frac{2}{v^2 \tau_1} \frac{\partial}{\partial \tau}$  accounts for phonon relaxation due to various phonon  
 173 scattering processes. The constant value  $v$  is the sound velocity of the longitudinal  
 174 acoustic phonon mode in STO. The  $\tau_0$  and  $\tau_1$  are fitted from the measurement data  
 175 and are less than 10 ps. The functional form of  $\tilde{s}(\mathbf{q})$  assumes that around each X-ray  
 176 photon absorption site, the source of the distortion in the equilibrium position follows  
 177 a Gaussian distribution with an amplitude  $u_0$  and size  $\sigma$ .

178 The exact solution of this equation is:

$$\tilde{\phi}(\mathbf{q}, \tau) = B \left( e^{-\frac{\tau}{\tau_0}} - e^{-\frac{\tau}{\tau_1}} \cos(f\tau) - \frac{\tau_1 - \tau_0}{f\tau_0\tau_1} e^{-\frac{\tau}{\tau_1}} \sin(f\tau) \right). \quad (\text{SI-17})$$

$$B = -\frac{u_0}{q^2 - 2(v^2\tau_1\tau_0)^{-1} + (v^2\tau_0^2)^{-1}} \exp\left(-\frac{1}{2} \sigma^2 q^2\right), \quad (\text{SI-18})$$

$$f = qv \sqrt{1 - (q^2 v^2 \tau_1^2)^{-1}}. \quad (\text{SI-19})$$

$$(\text{SI-20})$$

179 We assume that:

$$q^2 v^2 (\min(\tau_1, \tau_0))^2 \gg 1, \quad (\text{SI-21})$$

$$qv\tau_1\tau_0 \gg |\tau_1 - \tau_0|. \quad (\text{SI-22})$$

180 The result is simplified to:

$$\tilde{\phi}(\mathbf{q}, \tau) \approx -\frac{u_0}{q^2} \exp\left(-\frac{1}{2}\sigma^2 q^2\right) \left(e^{-\frac{\tau}{\tau_0}} - e^{-\frac{\tau}{\tau_1}} \cos(qv\tau)\right). \quad (\text{SI-23})$$

181 Therefore, the deformation associated with the longitudinal acoustic phonon with a  
182 wavevector  $\mathbf{q}$  is:

$$\tilde{\mathbf{u}}(\mathbf{q}, \tau) = \mathbf{q}\tilde{\phi}(\mathbf{q}, \tau) = -\hat{\mathbf{q}}\frac{u_0}{q} \exp\left(-\frac{1}{2}\sigma^2 q^2\right) \left(e^{-\frac{\tau}{\tau_0}} - e^{-\frac{\tau}{\tau_1}} \cos(qv\tau)\right), \quad (\text{SI-24})$$

183 where  $\hat{\mathbf{q}} \equiv \frac{\mathbf{q}}{|\mathbf{q}|}$ . This finishes the derivation of the strain field model for each single  
184 X-ray photon absorption used in this paper.

185 Here, the relation between  $\tilde{\mathbf{u}}(\mathbf{q}, \tau)$  and the real space displacement field,  $\mathbf{u}(\mathbf{r}, \tau)$ ,  
186 is:

$$\tilde{\mathbf{u}}(\mathbf{q}, \tau) \equiv \int \exp(-i\mathbf{q} \cdot \mathbf{r}) \mathbf{u}(\mathbf{r}, \tau) d\mathbf{r}. \quad (\text{SI-25})$$

### 187 **Note 2.3 Coherent enhancement**

188 Assume that on average there  $N$  single X-ray photon ionization sites in each coherent  
189 scattering volume  $V$ . The total displacement field is therefore:

$$\mathbf{U}(\mathbf{R}, \tau) = \sum_l^N \mathbf{u}(\mathbf{R} - \mathbf{r}_l, \tau). \quad (\text{SI-26})$$

190 Here,  $\mathbf{r}_l$  is the location of the  $l^{\text{th}}$  photon ionization site. Therefore:

$$\tilde{\mathbf{U}}(\mathbf{q}, \tau) = \tilde{\mathbf{u}}(\mathbf{q}, \tau) \sum_l^N \mathbf{e}^{i\mathbf{q} \cdot \mathbf{r}_l}. \quad (\text{SI-27})$$

191 Therefore, the total scattering intensity is:

$$I(\mathbf{Q}, \tau) = I_0(\mathbf{Q}) + I_{th} |F(\mathbf{H})|^2 \frac{V'}{V_c^2 V} |\mathbf{Q} \cdot \tilde{\mathbf{u}}(\mathbf{q}, \tau)|^2 \left\langle \left| \sum_l^N \mathbf{e}^{i\mathbf{q} \cdot \mathbf{r}_l} \right|^2 \right\rangle_V. \quad (\text{SI-28})$$

192 For the  $l^{\text{th}}$  X-ray photon absorption event, the probability density to find it at location  
193  $\mathbf{r}_l$  is  $P(\mathbf{r}_l) = V^{-1} (1 + \beta \cos(\mathbf{r}_l \cdot \mathbf{k}_{TG}))$ , where  $\beta$  is the contrast of the X-ray stand-  
194 ing wave. In our sparse photon absorption event limit, we can consider the photon  
195 absorption events to be independent from each other. Therefore:

$$\left\langle \left| \sum_l^N \mathbf{e}^{i\mathbf{q} \cdot \mathbf{r}_l} \right|^2 \right\rangle_V = N + \sum_{l \neq m}^N \left\langle \mathbf{e}^{i\mathbf{q} \cdot (\mathbf{r}_l - \mathbf{r}_m)} \right\rangle_V$$



$$\begin{aligned}
&= N + N(N-1) \int_{V^2} \mathbf{e}^{i\mathbf{q} \cdot (\mathbf{r}_1 - \mathbf{r}_2)} P(\mathbf{r}_1) P(\mathbf{r}_2) d^3\mathbf{r}_1 d^3\mathbf{r}_2 \\
&\approx N + N(N-1) \left( s(\mathbf{q}) + \frac{1}{4}\beta^2 s(\mathbf{q} - \mathbf{k}_{TG}) + \frac{1}{4}\beta^2 s(\mathbf{q} + \mathbf{k}_{TG}) \right)
\end{aligned} \tag{SI-29}$$

Here,

$$s(\mathbf{q}) \equiv \left| \frac{1}{V} \int_V e^{i\mathbf{q} \cdot \mathbf{r}} d^3\mathbf{r} \right|^2. \tag{SI-30}$$

When  $V$  is sufficiently large,  $s(\mathbf{q}) \approx \delta_{\mathbf{q}, \mathbf{0}}$  where  $\delta_{\mathbf{q}, \mathbf{0}}$  is the Kronecker delta. Since  $\mathbf{q} = \mathbf{Q} - \mathbf{H}$ , when  $\mathbf{q} = \mathbf{0}$ , it means we are measuring the Bragg diffraction which is not the focus of this study. Therefore, we only consider  $\mathbf{q} \neq \mathbf{0}$ . In this case,

$$\left\langle \left| \sum_l^N \mathbf{e}^{i\mathbf{q} \cdot \mathbf{r}_l} \right|^2 \right\rangle_V = \begin{cases} N & \text{if } \mathbf{q} \neq \mathbf{0}, \pm \mathbf{k}_{TG} \\ 1 + \beta^2 \frac{N(N-1)}{4} & \text{if } \mathbf{q} = \pm \mathbf{k}_{TG} \end{cases}. \tag{SI-31}$$

In our experiment, the calibration procedure guarantees a high contrast of the X-ray standing wave. Therefore, we assume  $\beta = 1$ . This yields the cited coherent enhancement factor in the main text. Combining with the solid angle comparison between the XTG peak and the pixel solid angle, we obtain the theoretical estimation of the overall enhancement with XTG excitation.

#### Note 2.4 Angular divergance

According to the kinematic diffraction theory, for a crystal of a thickness  $l$  and an X-ray with wavelength  $\lambda_0$ , the angular spread is [2]:

$$\Delta\phi' = 0.443 \frac{\lambda_0}{l} \frac{1}{\cos \theta_B}. \tag{SI-32}$$

Here,  $\theta_B$  is the Bragg angle. This  $\Delta\phi'$  is in the diffraction plane spanned by  $\mathbf{k}_3$ , and the reciprocal lattice  $\mathbf{H}$ . Since we are rotating around the sample surface normal direction  $\mathbf{n}$ , we need to account for the rotation axis difference when comparing with the measured angular spread.

Define:

$$\sigma \equiv \frac{\mathbf{k}_3 \times \hat{\mathbf{H}}}{|\mathbf{k}_3 \times \hat{\mathbf{H}}|}, \tag{SI-33}$$

$$\hat{\mathbf{H}} \equiv \frac{\mathbf{H}}{|\mathbf{H}|}. \tag{SI-34}$$

For a rotation of  $\mathbf{H}$  around  $\sigma$  of  $\Delta\phi'$ , the change of the reciprocal lattice is:

$$\mathbf{h}' \equiv (\sigma \times \mathbf{H}) \Delta\phi'. \tag{SI-35}$$

214 For a rotation of  $\mathbf{H}$  around  $\mathbf{n}$  of  $\Delta\phi$ , the change of the reciprocal lattice is:

$$\mathbf{h} \equiv (\mathbf{n} \times \mathbf{H}) \Delta\phi. \quad (\text{SI-36})$$

215 The  $\Delta\phi$  is what we measure in the experiment. We require the projection of  $\mathbf{h}$  in the  
216 diffraction plane to be of the same length as  $\mathbf{h}'$ . Therefore:

$$|\mathbf{h} - (\sigma \cdot \mathbf{h}) \sigma| = |\mathbf{h}'|, \quad (\text{SI-37})$$

$$\Rightarrow \left( (\mathbf{n} \times \mathbf{H})^2 - (\sigma \cdot ((\mathbf{n} \times \mathbf{H})))^2 \right) (\Delta\phi)^2 = (\sigma \times \mathbf{H})^2 (\Delta\phi')^2 = (\Delta\phi')^2. \quad (\text{SI-38})$$

218 With vectorial algebra, one can prove that:

$$((\mathbf{n} \times \mathbf{H}))^2 - (\sigma \cdot ((\mathbf{n} \times \mathbf{H})))^2 = |\mathbf{n} \cdot \sigma|^2. \quad (\text{SI-39})$$

219 Therefore, define  $\eta$  to be the angle between  $\mathbf{n}$  and  $\sigma$ :

$$\cos \eta \equiv \mathbf{n} \cdot \sigma \quad (\text{SI-40})$$

220 Then:

$$\Delta\phi = \frac{\Delta\phi'}{\cos \eta} = 0.443 \frac{\lambda_0}{l} \frac{1}{\cos \theta_B} \frac{1}{\cos \eta} \quad (\text{SI-41})$$

221 In our measurement,  $l$  corresponds to the spatial coherent length of the periodic  
222 excitation from the X-ray interference pattern.

## 223 Supplementary Note 3 Data Analysis

### 224 Note 3.1 Bragg diffraction simulation

225 Vectors in [Extended Data Figure 1\(e\)](#) take the following value at  $\phi = 0^\circ$ :

$$\mathbf{n} = (0.980, 0., -0.199), \quad (\text{SI-42})$$

$$\mathbf{H} = (3.153, 3.218, -0.642) \text{ \AA}^{-1}, \quad (\text{SI-43})$$

$$\mathbf{k}_1 = (0.026, 0.000, 4.966) \text{ \AA}^{-1}, \quad (\text{SI-44})$$

$$\mathbf{k}_2 = (0.026, 0.000, 4.966) \text{ \AA}^{-1}, \quad (\text{SI-45})$$

$$\mathbf{k}_3 = (-0.117, -1.973, 4.556) \text{ \AA}^{-1}, \quad (\text{SI-46})$$

$$\mathbf{k}_{\text{TG}} = (0.053, 0., 0.) \text{ \AA}^{-1}. \quad (\text{SI-47})$$

226 During the sample rotation around its normal direction  $\mathbf{n}$ , we calculate the reflec-  
227 tivity according to the two-beam dynamical diffraction theory, assuming a thick  
228 perfect crystal. The source code of the simulation is provided in the **Supplementary**  
229 **Data**.

### 230 Note 3.2 XTG-enhanced scattering intensity modulation

231 For the measured intensity modulation  $r(\mathbf{q}, \tau)$  with  $\Lambda_{\text{TG}} = 11.8 \text{ nm}$ , we find the  
232 first maxima of  $r(\mathbf{q}, \tau)$  in  $\tau$  for each  $q$ , which are marked with black dashed lines in  
233 [Figure 2\(c\)](#) and (d). Along the line of first maxima with each  $q$ , the value of  $r(\mathbf{q}, \tau)$  is  
234 shown in [Extended Data Figure 6\(a\)](#) with solid lines. We perform a linear fit of the  
235 line cut, and the result is shown with dashed lines in [Extended Data Figure 6\(a\)](#).

236 The ratio between the measured intensity modulation maxima,  $r_{\text{exp}} - 1$ , versus the  
237 linear fit,  $r_{\text{fit}} - 1$ , is shown in [Extended Data Figure 6\(b\)](#). From [Extended Data Figure](#)  
238 [6\(b\)](#), we determine that XTG induces an enhancement of the scattering intensity  
239 modulation at the XTG peak by a factor of 17 for  $-\mathbf{k}_{\text{TG}}$  and 11 for  $\mathbf{k}_{\text{TG}}$  in our  
240 measurement.

## References

- [1] Huang, Y., Sun, P., Teitelbaum, S.W., Li, H., Sun, Y., Wang, N., Song, S., Sato, T., Chollet, M., Osaka, T., Inoue, I., Duncan, R.A., Shin, H.D., Haber, J., Zhou, J., Bernardi, M., Gu, M., Rondinelli, J.M., Trigo, M., Yabashi, M., Maznev, A.A., Nelson, K.A., Zhu, D., Reis, D.A.: Nanometer-scale acoustic wave packets generated by stochastic core-level photoionization events. *Physics Review X* **14**, 041010 (2024)
- [2] Authier, A.: *Dynamical Theory of X-ray Diffraction*, p. 64. Springer, New York (2006)
